# Supplementary material for: Bulk and surface DFT investigations of inorganic halide perovskites screened using machine learning and materials property databases
Source: Royal Society of Chemistry journal article supplement (doi:10.1039/c9cp03240a), 2019-01-01
Supplement: c9cp03240a1.pdf [file c9cp03240a1.pdf]

## SUPPORTING INFORMATION

### Bulk and Surface DFT investigations of Inorganic Halide Perovskites Screened Using Machine Learning and Materials Property Databases

Deepak Jain<sup>#</sup>, Suryanaman Chaube<sup>#</sup>, Prerna Khullar<sup>#</sup>, Sriram Goverapet  
Srinivasan<sup>\*</sup> and Beena Rai

TCS Research, Tata Research Development and Design Center, 54-B Hadapsar  
Industrial Estate, Hadapsar, Pune – 411013, Maharashtra, India

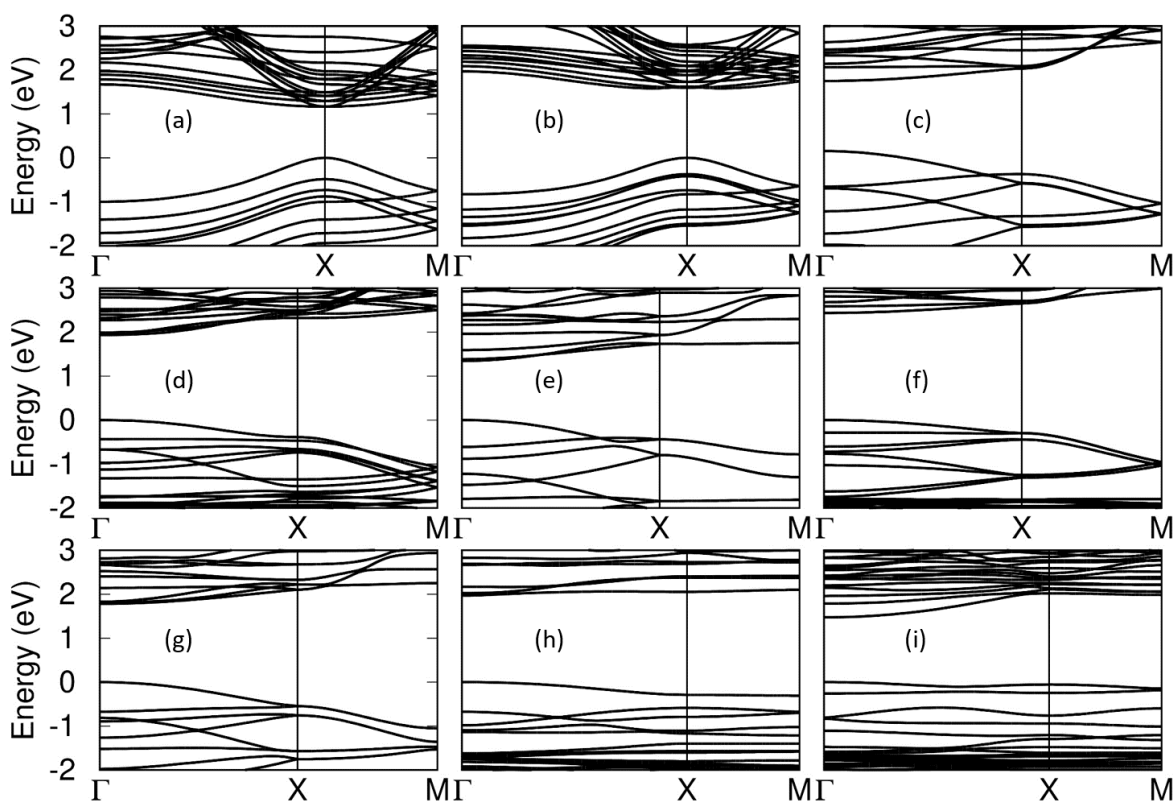

Bandstructures of  $\text{RbSnCl}_3$  surfaces: (a) (100)- $\text{RbCl}$ , (b) (100)- $\text{SnCl}_2$ , (c) (110)- $\text{Rb}$ , (d) (110)- $\text{SnCl}$ , (e) (110)- $\text{Cl}_1$ , (f) (110)- $\text{Cl}_2$ , (g) (110)- $\text{Cl}_3$ , (h) (111)- $\text{Sn}$  and (i) (111)- $\text{RbCl}_3$

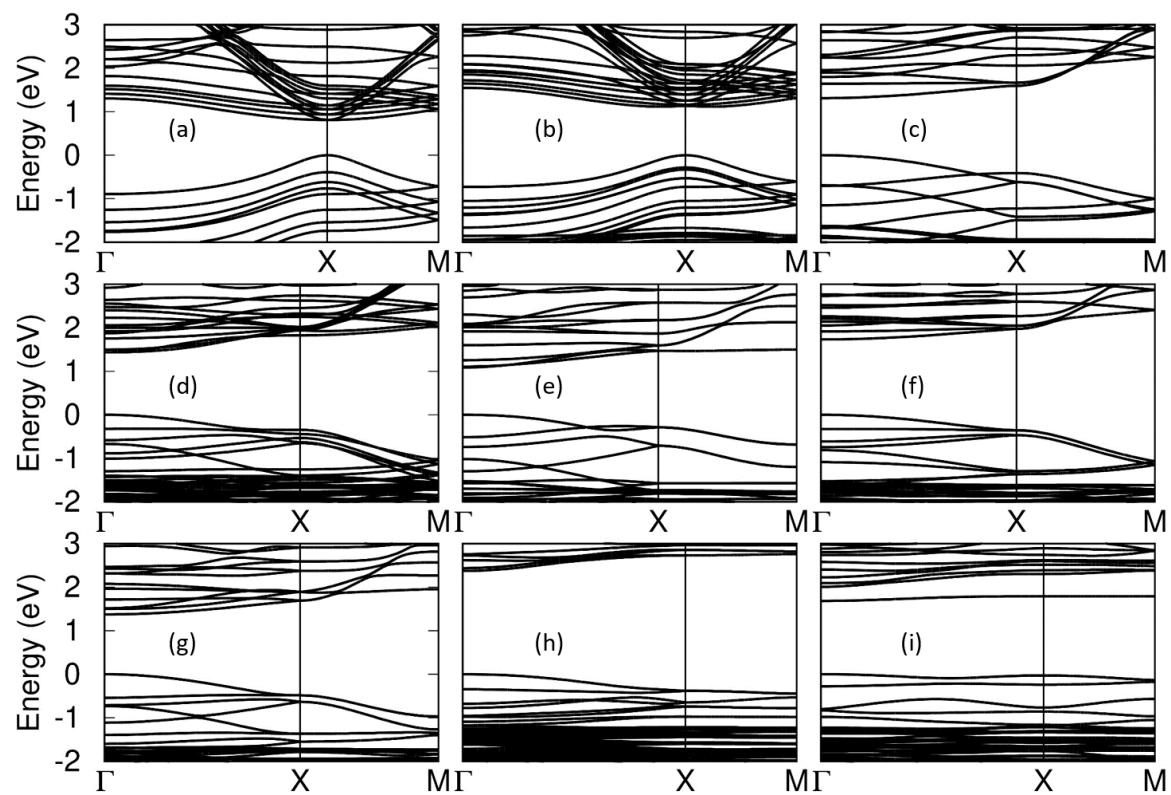

Bandstructures of RbSnBr<sub>3</sub> surfaces: (a) (100)-RbBr, (b) (100)-SnBr<sub>2</sub>, (c) (110)-Rb, (d) (110)-SnBr, (e) (110)-Br<sub>1</sub>, (f) (110)-Br<sub>2</sub>, (g) (110)-Br<sub>3</sub>, (h) (111)-Sn and (i) (111)-RbBr<sub>3</sub>
